# Supplementary material for: Chimpanzee accumulative stone throwing
Source: PubMed Central journal article supplement (PMC4770594; doi:10.1038/srep22219), 2016-02-29
Supplement: srep22219-s1.pdf [file srep22219-s1.pdf]

# Chimpanzee accumulative stone throwing

Hjalmar S. Kuhl<sup>1,2</sup>, Ammie K. Kalan<sup>1\*</sup>, Mimi Arandjelovic<sup>1</sup>, Floris Aubert<sup>3</sup>, Lucy D'Auvergne<sup>3</sup>, Annemarie Goedmakers<sup>4</sup>, Sorrel Jones<sup>1</sup>, Laura Kehoe<sup>3</sup>, Sebastien Regnaut<sup>3</sup>, Alexander Tickle<sup>1</sup>, Els Ton<sup>1,4</sup>, Joost van Schijndel<sup>1,4</sup>, Ekwoje E. Abwe<sup>5</sup>, Samuel Angedakin<sup>1</sup>, Anthony Agbor<sup>1</sup>, Emmanuel Ayuk Ayimisin<sup>1</sup>, Emma Bailey<sup>1</sup>, Mattia Bessone<sup>1</sup>, Matthieu Bonnet<sup>6</sup>, Gregory Brazolla<sup>1</sup>, Valentine Ebuja Buh<sup>1</sup>, Rebecca Chancellor<sup>7</sup>, Chloe Cipoletta<sup>8</sup>, Heather Cohen<sup>1</sup>, Katherine Corogenes<sup>1</sup>, Charlotte Coupland<sup>1</sup>, Bryan Curran<sup>6</sup>, Tobias Deschner<sup>1</sup>, Karsten Dierks<sup>1</sup>, Paula Dieguez<sup>1</sup>, Emmanuel Dilambaka<sup>8</sup>, Orume Diotoh<sup>9</sup>, Dervla Dowd<sup>3</sup>, Andrew Dunn<sup>8</sup>, Henk Eshuis<sup>1</sup>, Rumen Fernandez<sup>1</sup>, Yisa Ginath<sup>1</sup>, John Hart<sup>10</sup>, Martijn Ter Heegde<sup>11</sup>, Thurston Cleveland Hicks<sup>1</sup>, Inaoyom Imong<sup>1,8</sup>, Kathryn J. Jeffery<sup>12,13,14</sup>, Jessica Junker<sup>1</sup>, Parag Kadam<sup>15</sup>, Mohamed Kambi<sup>1</sup>, Ivonne Kienast<sup>1</sup>, Deo Kujirakwinja<sup>8</sup>, Kevin Langergraber<sup>16</sup>, Vincent Lapeyre<sup>3</sup>, Juan Lapuente<sup>1</sup>, Kevin Lee<sup>1</sup>, Vera Leinert<sup>3</sup>, Amelia Meier<sup>1</sup>, Giovanna Maretti<sup>1</sup>, Sergio Marrocoli<sup>1</sup>, Tanyi Julius Mbi<sup>1</sup>, Vianet Mihindou<sup>12</sup>, Yasmin Moebius<sup>1</sup>, David Morgan<sup>8,17</sup>, Bethan Morgan<sup>5,18</sup>, Felix Mulindahabi<sup>8</sup>, Mizuki Murai<sup>1</sup>, Protais Niyigabae<sup>8</sup>, Emma Normand<sup>3</sup>, Nicola Ntare<sup>8</sup>, Lucy Jayne Ormsby<sup>1</sup>, Alex Piel<sup>19</sup>, Jill Pruetz<sup>20</sup>, Aaron Rundus<sup>21</sup>, Crickette Sanz<sup>8,22</sup>, Volker Sommer<sup>23</sup>, Fiona Stewart<sup>15</sup>, Nikki Tagg<sup>24</sup>, Hilde VanLeeuwe<sup>8</sup>, Virginie Vergnes<sup>3</sup>, Jacob Willie<sup>24</sup>, Roman M. Wittig<sup>1,25</sup>, Klaus Zuberbuehler<sup>26</sup>, Christophe Boesch<sup>1,3</sup>

## Affiliations

<sup>1</sup> Max Planck Institute for Evolutionary Anthropology (MPI EVAN), Deutscher Platz 6, 04103 Leipzig

<sup>2</sup> German Centre for Integrative Biodiversity Research (iDiv) Halle-Leipzig-Jena, Deutscher Platz 5e, 04103 Leipzig

<sup>3</sup> Wild Chimpanzee Foundation (WCF), Deutscher Platz 6, 04103 Leipzig

<sup>4</sup> Chimbo Foundation, Amstel 49, 1011 PW Amsterdam, Netherlands

<sup>5</sup> Ebo Forest Research Project, BP3055, Messa, Cameroon

<sup>6</sup> The Aspinall Foundation, Port Lympne Wild Animal Park, Hythe, Kent, UK

<sup>7</sup> West Chester University, Departments of Anthropology & Sociology and Psychology, West Chester, PA, USA

<sup>8</sup> Wildlife Conservation Society (WCS), 2300 Southern Boulevard, Bronx, New York 10460, USA

<sup>9</sup> Korup Rainforest Conservation Society, c/o Korup National Park, P.O. Box 36 Mundemba, South West Region, Cameroon

<sup>10</sup> Lukuru Foundation, 1235 Avenue des Poids Lourds / Quartier de Kingabo, Kinshasa, DRC

<sup>11</sup> WWF Cameroon Country Office, BP6776; Yaoundé, Cameroon

<sup>12</sup> Agence National des Parcs Nationaux (ANPN) Batterie 4, BP20379, Libreville, Gabon

<sup>13</sup> School of Natural Sciences, University of Stirling, UK

<sup>14</sup> Institute de Recherche en Ecologie Tropicale, Libreville, Gabon

<sup>15</sup> University of Cambridge, Pembroke Street, Cambridge, UK CB2 3QG

<sup>16</sup> Arizona State University, PO Box 872402, Tempe, AZ 85287-2402 USA

<sup>17</sup> Lester E. Fisher Center for the Study and Conservation of Apes, Lincoln Park Zoo, 2001 North Clark Street, Chicago, Illinois 60614 USA

<sup>18</sup> Institute for Conservation Research, Zoological Society of San Diego, Escondido, CA 92025, USA

<sup>19</sup> School of Natural Sciences and Psychology, Liverpool John Moores University, James Parsons Building, Rm653 Byrom Street, Liverpool L3 3AF, UK

<sup>20</sup> Iowa State University, Department of Anthropology, 324 Curtiss Hall, Ames, IA 50011, USA

<sup>21</sup> West Chester University, Department of Psychology, 700 S High St., West Chester, PA, 19382 USA

<sup>22</sup> Washington University Saint Louis, Department of Anthropology, One Brookings Drive, St. Louis, MO 63130, USA

<sup>23</sup> University College London, Department of Anthropology, 14 Taviton Street, London WC1H 0BW, UK

<sup>24</sup> KMDA, Centre for Research and Conservation, Royal Zoological Society of Antwerp, Koningin Astridplein 20-26, B-2018 Antwerp, Belgium

<sup>25</sup> Taï Chimpanzee Project, Centre Suisse de Recherches Scientifiques, BP 1301, Abidjan 01, CI

<sup>26</sup> Université de Neuchâtel, Institut de Biologie, Rue Emile-Argand 11, 2000 Neuchâtel, Switzerland

Corresponding author: \*Ammie K. Kalan, [ammie\\_kalan@eva.mpg.de](mailto:ammie_kalan@eva.mpg.de)

**Supplementary Table 1.** Site name and coordinates of all PanAf temporary research sites (TRSs) where data on chimpanzee accumulative stone throwing behaviour were collected or on-going, and all mid- to long-term research sites (LRS) on habituated chimpanzees where the behaviour is absent from published literature (see Figure 1 in the main manuscript). TRS at LRS refers to sites where the PanAf data collection protocol was carried out at a TRS on the LRS chimpanzee study community. PanAf TRS duration was 14-17 months unless otherwise stated.

| Country       | Site                   | Longitude  | Latitude  | Site       |
|---------------|------------------------|------------|-----------|------------|
| Cameroon      | Campo Ma'an            | 10.463100  | 2.637160  | TRS        |
| Cameroon      | Ebo                    | 10.330000  | 4.319000  | LRS        |
| Cameroon      | Ebo southwest          | 10.383333  | 4.600000  | TRS        |
| Cameroon      | Korup                  | 9.057099   | 5.286061  | TRS        |
| Cameroon      | La Belgique/Dja        | 13.150000  | 3.416670  | TRS at LRS |
| Cameroon      | Mt Cameroon            | 9.172730   | 4.217340  | TRS        |
| Côte d'Ivoire | Comoé GEPRENAF         | -3.707890  | 8.841651  | TRS        |
| Côte d'Ivoire | Djouroutou             | -7.283333  | 5.366667  | TRS        |
| Côte d'Ivoire | Mt Sangbe              | -7.262975  | 7.952841  | TRS        |
| Côte d'Ivoire | Taï E                  | -7.314150  | 5.893359  | TRS        |
| Côte d'Ivoire | Tai east               | -7.3333    | 5.8667    | LRS        |
| Côte d'Ivoire | Tai middle             | -7.3333    | 5.8667    | LRS        |
| Côte d'Ivoire | Tai north              | -7.3333    | 5.8667    | LRS        |
| Côte d'Ivoire | Taï R                  | -7.333300  | 5.866700  | TRS        |
| Côte d'Ivoire | Tai south              | -7.3333    | 5.8667    | LRS        |
| DR-Congo      | Bili-Uere              | 25.868755  | 4.602616  | TRS        |
| DR-Congo      | Kabogo <sup>1</sup>    | 29.694487  | -7.129425 | TRS        |
| DR-Congo      | Kahuzi Biega           | 28.726501  | -2.155465 | LRS        |
| DR-Congo      | Rubi-Tele <sup>2</sup> | 24.856460  | 2.647449  | TRS        |
| Gabon         | Bateke                 | 14.041160  | -2.167566 | TRS        |
| Gabon         | Loango                 | 9.480000   | -2.090000 | TRS at LRS |
| Gabon         | Lope                   | 11.583300  | -0.166700 | TRS        |
| Guinea        | Bakoun                 | -12.500000 | 11.900000 | TRS        |
| Guinea        | Bossou                 | -8.5000    | 7.6500    | LRS        |
| Guinea        | Sangaredi              | -13.766667 | 11.100000 | TRS        |
| Guinea        | Sobeya                 | -11.709126 | 10.259386 | TRS        |
| Guinea Bissau | Boe                    | -14.216666 | 11.750000 | TRS        |
| Liberia       | Grebo                  | -7.732278  | 5.405889  | TRS        |
| Liberia       | Mt. Nimba              | -8.493388  | 7.219052  | TRS        |
| Liberia       | Sapo                   | -8.414625  | 5.411114  | TRS        |

|                          |                     |            |           |            |
|--------------------------|---------------------|------------|-----------|------------|
| <b>Mali</b>              | Bafing <sup>3</sup> | -10.307343 | 12.578020 | TRS        |
| <b>Nigeria</b>           | Gashaka             | 11.700000  | 7.566667  | TRS at LRS |
| <b>Nigeria</b>           | Mbe                 | 9.041748   | 6.257967  | TRS        |
| <b>Republic of Congo</b> | Conkouati           | 11.416667  | -3.800000 | TRS        |
| <b>Republic of Congo</b> | Goualougo           | 16.866667  | 2.100000  | LRS        |
| <b>Rwanda</b>            | Gishwati            | 29.427028  | -1.747220 | TRS at LRS |
| <b>Rwanda</b>            | Nyungwe             | 29.292778  | -2.490000 | TRS        |
| <b>Senegal</b>           | Fongoli             | -12.166    | 12.666    | LRS        |
| <b>Senegal</b>           | Kayan               | -12.293810 | 13.182780 | TRS        |
| <b>Senegal</b>           | Mt. Assirik         | -12.7667   | 12.8833   | LRS        |
| <b>Tanzania</b>          | Gombe               | 29.61643   | -4.695511 | LRS        |
| <b>Tanzania</b>          | Mahale              | 29.7333    | -6.1167   | LRS        |
| <b>Tanzania</b>          | Semliki             | 30.3333    | 0.8333    | LRS        |
| <b>Tanzania</b>          | Ugalla              | 30.616700  | -5.316700 | TRS at LRS |
| <b>Uganda</b>            | Budongo             | 31.500000  | 1.750000  | LRS        |
| <b>Uganda</b>            | Budongo east        | 31.500000  | 1.750000  | TRS        |
| <b>Uganda</b>            | Bwindi              | 29.708330  | -1.008333 | TRS        |
| <b>Uganda</b>            | Kalinzu             | 30.117     | -0.283    | LRS        |
| <b>Uganda</b>            | Kanyawara           | 30.3667    | 0.5667    | LRS        |
| <b>Uganda</b>            | Ngogo               | 30.432130  | 0.546562  | LRS        |
| <b>Uganda</b>            | Ngogo east          | 30.462340  | 0.523217  | TRS        |

<sup>1</sup>Duration of site 4 months

<sup>2</sup>Duration of site 10 months

<sup>3</sup>Duration of site 7 months

### Supplementary Movie Data

Supplementary Movie 1. Adult female chimpanzee picks up a rock and hurls it at the tree at Boé, Guinea-Bissau.

Supplementary Movie 2. Adult male chimpanzee takes a rock from the hollow of a tree and hurls it again at the same tree at Boé, Guinea-Bissau.

Supplementary Movie 3. Adult male chimpanzee tosses a stone into the hollow cavity of a tree at Boé, Guinea-Bissau.

Supplementary Movie 4. Adult male chimpanzee at Nimba, Liberia leaf clips, then picks up a rock and hurls it at the tree.

Supplementary Movie 5. A one-armed adult male chimpanzee hurls a rock at a tree at Nimba, Liberia.

Supplementary Movie 6. A juvenile chimpanzee bangs a stone against a tree at Sangaredi, Guinea before tossing it into the tree cavity.

Supplementary Movie 7. An adult male chimpanzee picks up a rock and bangs it against the tree at GEPRENAF, Côte d'Ivoire.
